# Supplementary material for: Mucoadhesive chitosan–methylcellulose oral patches for the treatment of local mouth bacterial infections
Source: Royal Society of Chemistry journal article supplement (doi:10.1039/d2bm01540d), 2023-01-01
Supplement: d2bm01540d1.pdf [file d2bm01540d1.pdf]

## **Mucoadhesive chitosan-methylcellulose oral patches for the treatment of local mouth bacterial infections**

Lorenzo Bonetti, <sup>\*a</sup> Alice Caprioglio, <sup>a</sup> Nina Bono, <sup>a,b</sup> Gabriele Candiani <sup>a,b</sup> and Lina Altomare <sup>\*a,b</sup>

<sup>a</sup> Department of Chemistry, Materials and Chemical Engineering “G. Natta”, Politecnico di Milano, Via Luigi Mancinelli 7, 20131, Milan, Italy

<sup>b</sup> National Interuniversity Consortium of Materials Science and Technology (INSTM), Via Giuseppe Giusti 9, 50121 Florence, Italy

## Supporting Info 1: Artificial saliva preparation

Artificial saliva was prepared according to the previous literature [1,2]. Briefly, the reagents reported in Table S 1 were dissolved in deionized water (dH<sub>2</sub>O) at 37 °C. If necessary, the final pH was adjusted to 6.8 through the addition of 0.1 M HCl solution.

Table S 1 - Artificial saliva composition

| <b>Reagent</b>                                                       | <b>Molecular Weight<br/>(g/mol)</b> | <b>Concentration<br/>(mg/L)</b> |
|----------------------------------------------------------------------|-------------------------------------|---------------------------------|
| Calcium chloride<br>(CaCl <sub>2</sub> )                             | 110.98                              | 172.0                           |
| Potassium chloride<br>(KCl)                                          | 74.55                               | 963.9                           |
| Potassium dihydrogen phosphate<br>(KH <sub>2</sub> PO <sub>4</sub> ) | 136.09                              | 654.5                           |
| Potassium thiocyanate<br>(KSCN)                                      | 97.18                               | 189.2                           |
| Sodium chloride<br>(NaCl)                                            | 58.44                               | 125.6                           |
| Sodium bicarbonate<br>(NaHCO <sub>3</sub> )                          | 84.01                               | 630.8                           |
| Sodium sulphate<br>(Na <sub>2</sub> SO <sub>4</sub> )                | 142.04                              | 336.5                           |
| Ammonium chloride<br>(NH <sub>4</sub> Cl)                            | 53.49                               | 178.0                           |
| Urea<br>(CO(NH <sub>2</sub> ) <sub>2</sub> )                         | 60.06                               | 200.0                           |

## Supporting Info 2: GS calibration curve

A standard calibration curve was first obtained for GS in PBS. GS was prepared at different concentrations ranging from 0.1 to 1,000  $\mu\text{g/mL}$ . Next, 80  $\mu\text{L}$  of GS in PBS solution at different concentrations were taken from each well, mixed with 40  $\mu\text{L}$  of the TNBSA solution (1:500 in 0.1 M  $\text{NaHCO}_3$ ), and incubated at 37  $^\circ\text{C}$  for 2 h in a 96-well culture plate. The absorbance was measured at  $\lambda = 364 \text{ nm}$  with a Synergy H1 spectrophotometer (BioTek, Italy) and plotted, after blank (fresh PBS mixed with the TNBSA solution) subtraction, as a function of GS concentration. Tests were carried out in triplicate ( $n = 3$ ). A linear relationship ( $R^2 \geq 0.99$ ) between the absorbance and the GS concentration was detected in the 0.1 – 100  $\mu\text{g/mL}$  range (Figure S 1). The resulting curve was used to quantify the GS in CS-MC samples.

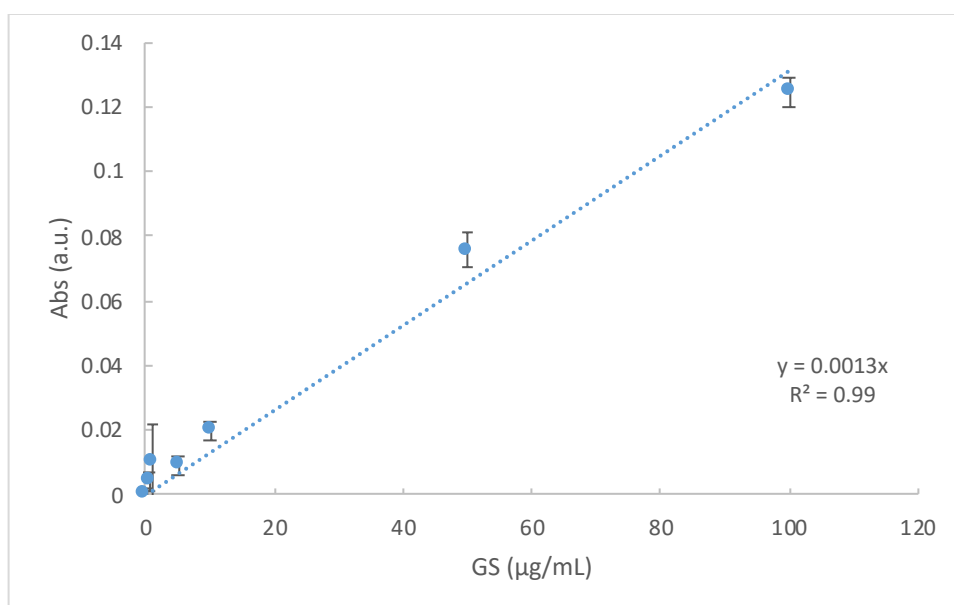

Figure S 1 – Calibration curve obtained for GS in the 0.1 – 100  $\mu\text{g/mL}$  range.

Supporting

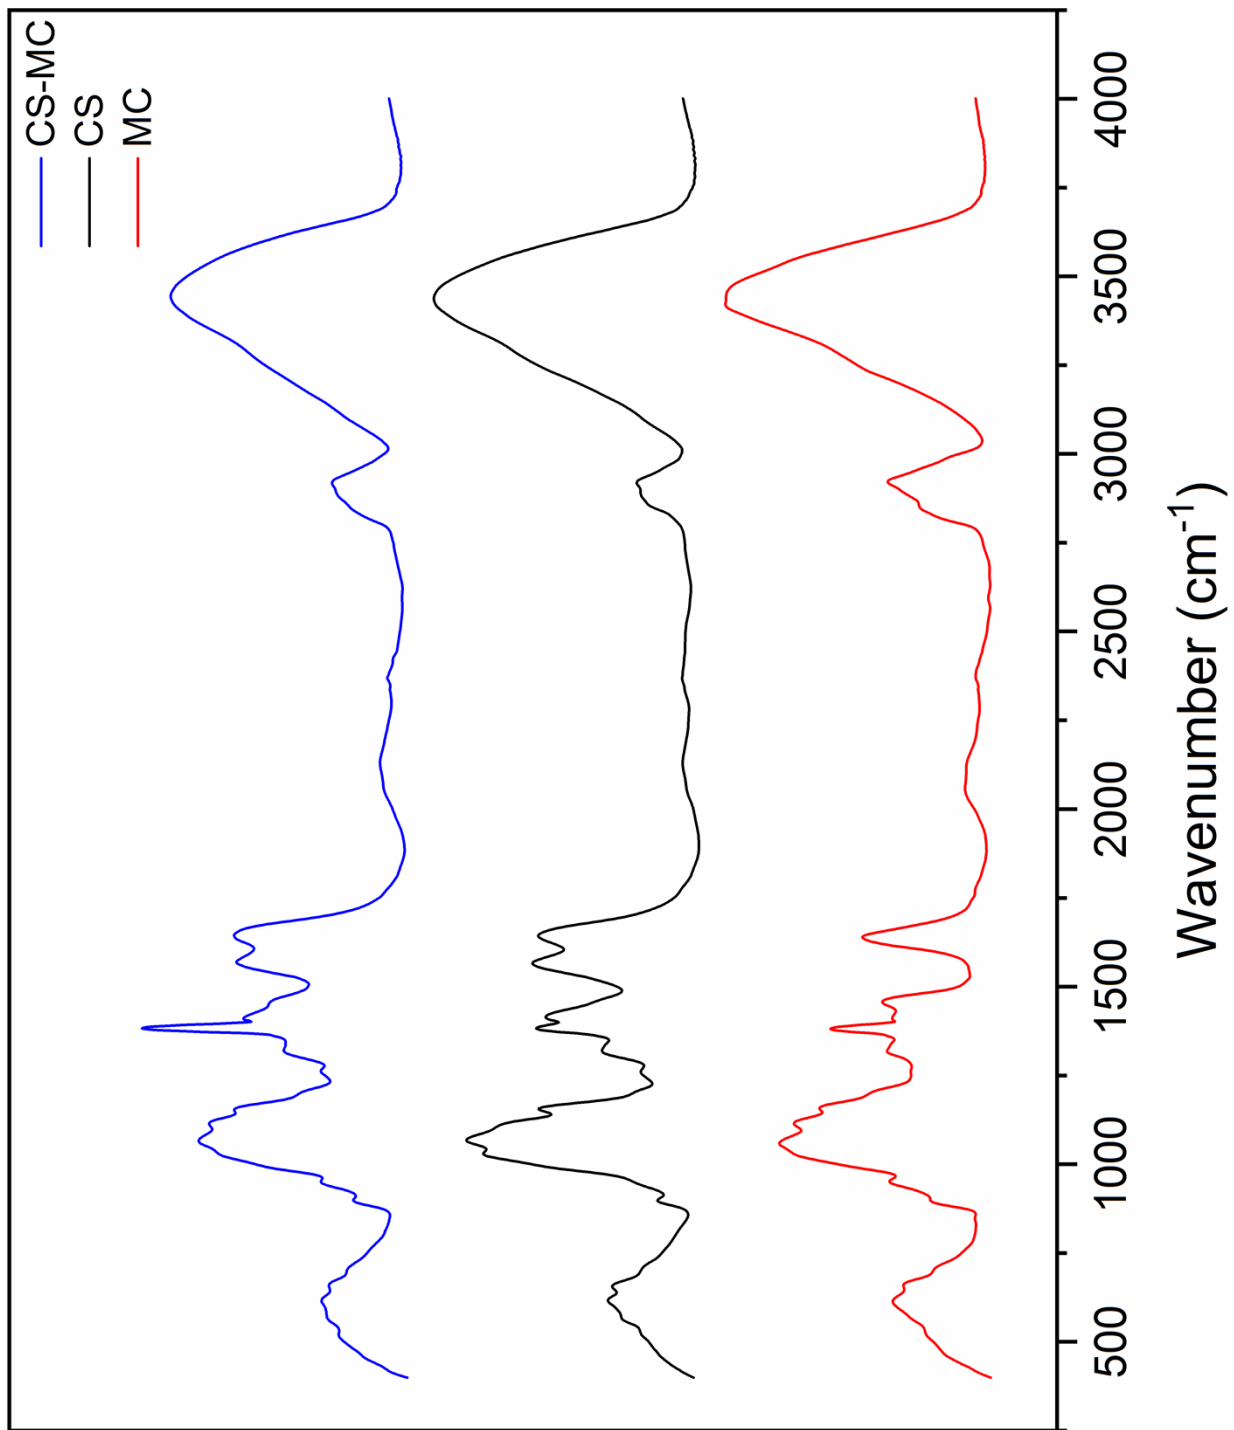

Figure S 2 – FT-IR spectra of CS, MC, and CS-MC samples

#### Supporting Info 4: Ninhydrin assay for CS quantification

CS fraction in CS-MC patches was assessed by ninhydrin assay [3], determining the primary amino groups of CS. Two solutions were prepared as follows:

Solution I: 1.05 g of citric acid, 10 mL of a 1.0 M aqueous NaOH solution, and 0.04 g  $\text{SnCl}_2 \cdot 2\text{H}_2\text{O}$  were mixed, then deionized water ( $\text{dH}_2\text{O}$ ) was added until 25 mL;

Solution II: 1 g of ninhydrin was added to 25 mL ethylene glycol monomethyl ether.

Solution I and II were stirred for 45 min to give the final solution (NHN solution), which was stored in the dark until use. For the assay, CS and CS-MC specimens were soaked in 0.25 M acetic acid (AA) (1 mg sample: 670  $\mu\text{L}$  AA) and allowed to dissolve overnight (ON) at room temperature (r.t.). 900  $\mu\text{L}$  of NHN solution was next added, and the samples were heated at 100  $^\circ\text{C}$  for 30 min. The solution was then cooled down in an ice bath, then diluted with 2 mL of a mixture of 50 % isopropanol in  $\text{dH}_2\text{O}$ . A blank was also prepared using water, 0.25 M AA, and the NHN solution. The absorbance of the solutions was read at  $\lambda = 570$  nm with a Synergy H1 spectrophotometer.

CS fraction in CS-MC samples was calculated as follows (Eq. S0):

$$CS (\%) = \left[ \frac{RFU_{CS-MC} - RFU_{BLK}}{RFU_{CS} - RFU_{BLK}} \right] \times 100 \quad (\text{S0})$$

where  $RFU_{CS-MC}$ ,  $RFU_{CS}$ , and  $RFU_{BLK}$  are the fluorescence of CS-MC, CS, and blank solutions, respectively.

The mean CS content in the CS-MC patches was 66.2 %, in accordance with the results of the dissolution tests (please refer to the main text).

## References

1. Pistone, S.; Goycoolea, F.M.; Young, A.; Smistad, G.; Hiorth, M. Formulation of polysaccharide-based nanoparticles for local administration into the oral cavity. *Eur. J. Pharm. Sci.* **2017**, *96*, 381–389.
2. Gal, J. About a synthetic saliva for in vitro studies. *Talanta* **2001**, *53*, 1103–1115.
3. Cui, L.; Jia, J.; Guo, Y.; Liu, Y.; Zhu, P. Preparation and characterization of IPN hydrogels composed of chitosan and gelatin cross-linked by genipin. *Carbohydr. Polym.* **2014**, *99*, 31–38.
